# 1 **A comparative study of deconvolution methods for RNA-** 2 **seq data under a dynamic testing landscape**

3 Haijing Jin<sup>1</sup> and Zhandong Liu<sup>\*2,3</sup>

- 4 1. Graduate Program in Quantitative and Computational Biosciences, Baylor College of  
5 Medicine, United States
- 6 2. Jan and Dan Duncan Neurological Research Institute at Texas Children's Hospital,  
7 Houston, United States
- 8 3. Department of Pediatrics, Baylor College of Medicine, Houston, United States

## 9 10 **Abstract**

11 Deconvolution analyses have been widely used to track compositional alternations of  
12 cell-types in gene expression data. Even though numerous novel methods have been  
13 developed in recent years, researchers are still having difficulty selecting optimal  
14 deconvolution methods due to the lack of comprehensive benchmarks relative to the newly  
15 developed methods. To systematically reveal the pitfalls and challenges of deconvolution  
16 analyses, we studied the impact of several technical and biological factors such as simulation  
17 model, quantification unit, component number, weight matrix, and unknown content by  
18 constructing three benchmarking frameworks that cover comparative analysis of 11 popular  
19 deconvolution methods under 1,766 conditions. We hope this study can provide new

20 insights to researchers for future application, standardization, and development of  
21 deconvolution tools on RNA-seq data.

## 22 **Background**

23 Deconvolution refers to a process that separates a heterogeneous mixture signal into  
24 its constituent components. In the biomedical field, researchers have been using  
25 deconvolution methods to derive cell-type-specific signals<sup>1-3</sup> from heterogeneous mixture  
26 data. Cellular composition information is crucial for developing sophisticated diagnostic  
27 techniques as it enables researchers to track each cellular component's contribution during  
28 disease progressions<sup>4</sup>. Although some experimental approaches like fluorescence-activated  
29 cell sorting(FACS), immunohistochemistry(IHC), and single-cell RNA-seq can derive cell-  
30 type proportion data<sup>3</sup>, all these approaches are either restricted by its throughput or remain  
31 too costly and laborious for large-scale clinical applications. By far, deconvolution is  
32 recognized as the most cost-effect approach to derive cell-type proportion data from  
33 heterogenous biospecimens and has the potential to bring a considerable improvement in  
34 the speed and scale of cell-type-specific clinical diagnosis.

35 By January 2018, there have been around 50 deconvolution methods developed<sup>2</sup> and  
36 researchers are now facing the challenge of selecting the right method for deconvolution  
37 analysis. In a methodological paper, authors usually compared the method of their own to  
38 a chosen set of published methods and arrived at the conclusion that their method was the  
39 best. However, only a limited number of deconvolution methods and biological conditions  
40 were considered in these comparisons. Moreover, different research groups applied

41 inconsistent testing frameworks with different simulation strategies, evaluation metrics, and  
42 cell-type annotations, making it difficult for researchers to determine the optimal method  
43 for the deconvolution analysis. For a fair and comprehensive comparison of deconvolution  
44 applications in complex biological systems, an independent benchmarking is in need<sup>5</sup>.  
45 Previously, Sturm *et al.*<sup>3</sup> and Cobos *et al.*<sup>6</sup> performed quantitative evaluations of reference-  
46 based and marker-based deconvolution methods on RNA-seq data. Sturm *et al.*<sup>3</sup> focused on  
47 spill-over effects, minimal detection fraction, and background predictions and suggested  
48 removing non-specific signature genes to improve deconvolution accuracy. Cobos *et*  
49 *al.*<sup>6</sup> focused on the impact of different normalization strategies, reference platforms, marker  
50 gene selection strategies, and missing cellular components in the reference. Compared with  
51 previous benchmarks, our study focuses on technical and biological factors caused by varied  
52 experimental mixture conditions such as mixture noise levels, quantification unit selection,  
53 cellular component number, weight matrix property, and unknown cellular contents. We  
54 also studied the major factors that determine an evaluation framework, such as simulation  
55 model selection, evaluation metric selection, and measurement scale selection. Our work  
56 carefully examined the joint impact of different technical parameters and biological design  
57 factors to provide an insightful reference guide for mixture condition determination and  
58 deconvolution method selection.

59 There are three types of benchmarking frameworks for the evaluation of  
60 deconvolution methods: *in silico* framework<sup>7,8</sup>, *in vitro* framework<sup>9</sup>, and *in vivo* framework<sup>10</sup>  
61 (Supplementary Table 1). The *in vivo* testing framework mainly rely on indirect performance  
62 assessment and usually cannot derive a definite conclusion of the method's performance.  
63 Only a few *in vivo* benchmarking datasets<sup>3</sup> have coupled FACS results. Nevertheless, these

64 benchmarking datasets are often restricted by limited cell types and sample numbers<sup>3,8</sup>. The  
65 *in vitro* testing framework where mixtures are generated in the tube with predefined mixing  
66 compositions also suffers from limited cell types and sample numbers. Moreover, most *in*  
67 *vitro* testing frameworks applied ‘orthogonal’ weights, leading to over-optimistic  
68 performance assessment. The *in silico* testing framework uses RNA-seq profiles from  
69 purified biological samples as primary building blocks and generates heterogeneous mixing  
70 samples by *in silico* mixing procedures. Among all three benchmarking frameworks, we  
71 selected the *in silico* testing framework to systematically explore the impact of different  
72 biological and technical factors, which require large amounts of benchmarking datasets  
73 under controlled and finely tuned multi-factor testing environments.

74 To provide a reliable reference for the application and development of deconvolution  
75 methods, we compared 11 deconvolution methods (Figure 1b and Supplementary Table 3).  
76 To establish benchmarking frameworks that mimic application scenarios of more  
77 complicated and diverse biological systems, we designed three sets of benchmarking  
78 frameworks that mimic up to 1,766 biological conditions with varying noise levels, library  
79 sizes, cellular component numbers, weight matrix properties, simulation models, and  
80 proportions of unknown contents (Figure 1a, Supplementary Table 2). To determine the  
81 impact of evaluation frameworks, we performed comparisons under different simulation  
82 models and measurement scales with two sets of evaluation metrics: correlation (Pearson's  
83 Correlation Coefficient) and mAD (Mean Absolute Deviation)(Methods). Compared with  
84 previous benchmarks, we applied more flexible and sophisticated simulation strategies to  
85 create mixtures covering dynamic conditions, which enable us to investigate the tipping  
86 point where each method deteriorates. Moreover, we studied the impact of commonly

87 applied simulation strategies, and by comparison to the real mixture data, we derived  
88 improved simulation strategies that can generate more complex and yet authentic  
89 simulation data. Our results provide a dynamic testing landscape that allows the user to  
90 select the right method that performs well in the targeted experimental condition.

## 91 **Results**

### 92 **Using simulation to generate diverse deconvolution testing environments**

93 We designed three benchmarking frameworks to test the performance of  
94 deconvolution methods under multiple application scenarios. Each framework was designed  
95 to study the impact of specific technical and biological factors on deconvolution analysis  
96 (Figure 1a). The first benchmarking framework (Sim1) was designed to reveal the impact of  
97 the noise structure under diverse noise levels. The second benchmarking framework (Sim2)  
98 was designed to reveal the impact of cellular component numbers and weight matrix  
99 properties. The third benchmarking framework (Sim3) was designed to reveal the impact of  
100 unknown biological contents and measurement scales.

101 In an *in silico* benchmarking framework, a deconvolution testing environment  
102 consists of mixture data, reference data, ground truths, and testing methods. Mixture data  
103 refers to heterogeneous gene expression profiles for deconvolution. Reference data refers to  
104 homogeneous cell-type-specific data, which is used to guide the deconvolution process.

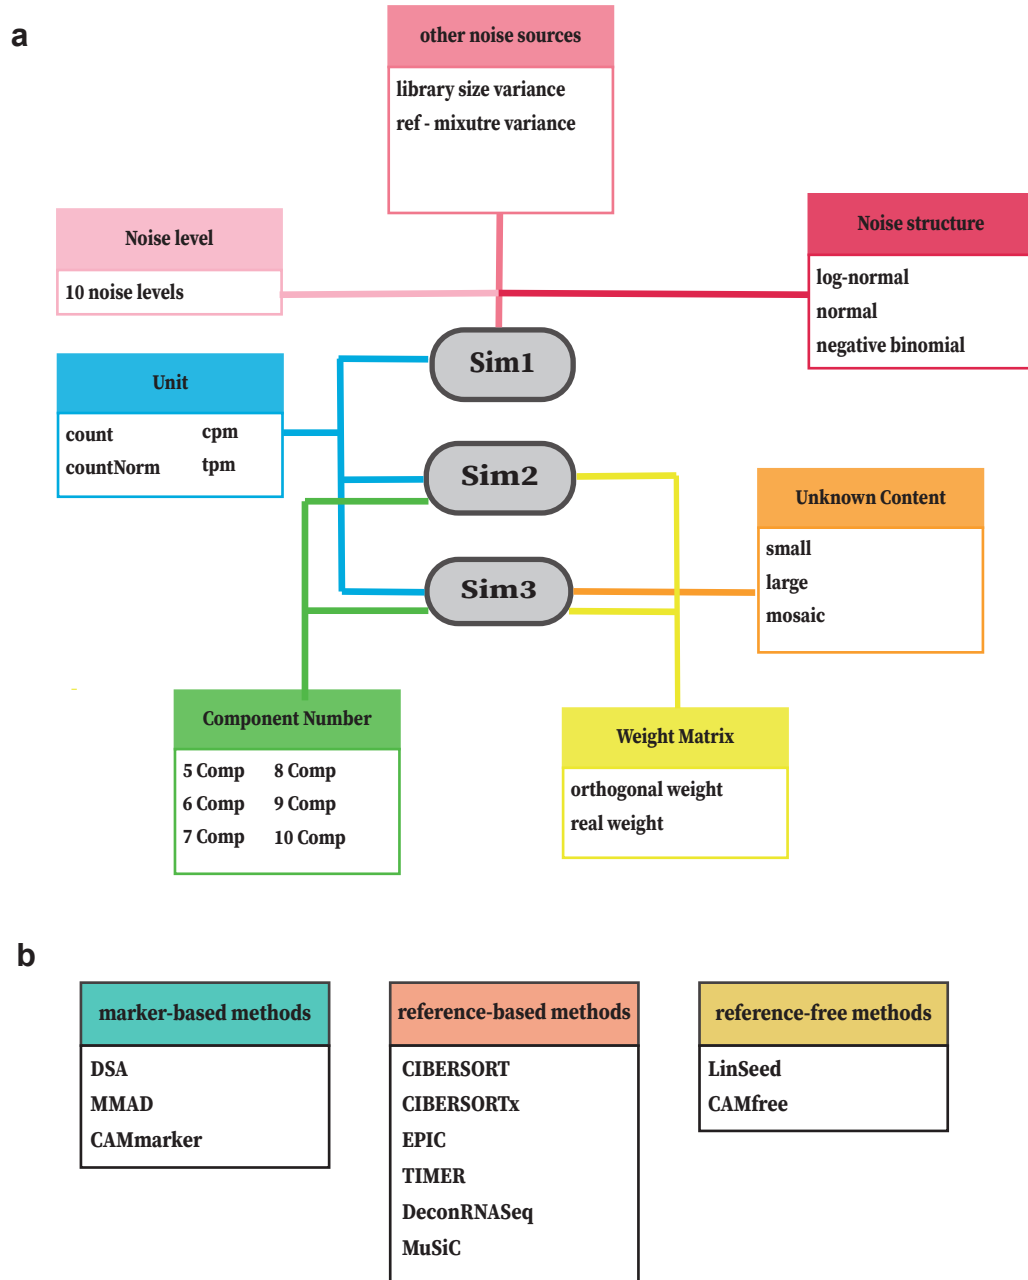

105

106 **Fig.1| Overview of *in silico* testing frameworks and methods categorization**

107 **a**, Three benchmarking frameworks were constructed to investigate the impact of seven factors that affect  
 108 deconvolution analysis: noise level, noise structure, other noise sources, quantification unit, unknown content,  
 109 component number, and weight matrix. **b**, 11 deconvolution methods are tested and have been categorized  
 110 based on the required reference input: marker-based, reference-based, and reference-free.

111 Ground truths refer to the real mixing proportions of constituent cell types in the mixture  
112 data. The accuracy of deconvolution methods can be assessed by comparing estimated  
113 proportions to the ground truths. Reference data can vary based on the required input of the  
114 tested deconvolution method. In this study, we classified eleven deconvolution methods  
115 according to the required reference data in the following categories: marker-based,  
116 reference-based, and reference-free (Figure 1b, Supplementary Table 3). Marker-based  
117 methods such as DSA<sup>11</sup>, MMAD<sup>12</sup>, and CAMmarker<sup>13</sup> use marker gene lists to guide the  
118 deconvolution analysis. Reference-based methods such as CIBERSORT<sup>7</sup>, CIBERSORTx<sup>8</sup>,  
119 EPIC<sup>14</sup>, TIMER<sup>10</sup>, DeconRNASeq<sup>15</sup>, and MuSiC<sup>16</sup> use cell-type-specific gene expression  
120 profiles. Except for MuSiC<sup>16</sup>, nearly all reference-based methods require signature gene lists  
121 as an additional input. MuSiC<sup>16</sup> implements weighted non-negative least squares regression  
122 (W-NNLS) and does not require any pre-determined gene sets. Finally, reference-free  
123 methods such as LinSeed<sup>17</sup> and CAMfree<sup>13</sup> do not require any external references.

#### 124 **Selection of simulation model affects the deconvolution evaluation**

125 The benchmarking framework Sim1\_simModel is designed to learn the impact of  
126 noise structure under different noise levels (Fig. 1a, Methods). To understand the impact of  
127 noise structure, we simulated noise based on three simulation models: normal, log-normal,  
128 and negative binomial (nb). All these simulation models have been applied in previous  
129 publications<sup>7,15,17-19</sup> to generate *in silico* mixing expression profiles. For each simulation  
130 model, we generated ten levels of noise to evaluate the robustness of deconvolution methods  
131 to the magnitude of noise (Supplementary Fig. 1a). To ensure the generality of our conclusion  
132 across different datasets and account for reference-mixture variance, we performed  
133 repeated mixture simulation with three independent blood datasets and created nine testing

134 environments with different mixture-reference pairs (Methods, Supplementary Table 2 and  
135 Supplementary Table 4).

136 For the noise level, consistent with previous findings, we observed that the accuracies  
137 of the deconvolution methods decreased as the noise level increased, which was exhibited  
138 as decreasing correlation (Supplementary Fig. 3) and increasing mAD (Supplementary Fig.  
139 4) values. We also noticed that the impact of the RNA-seq quantification unit is trivial  
140 (Supplementary Fig. 3 and 4) and thus selected the most commonly used unit tpm for  
141 remaining illustrations of testing results in Sim1\_simModel. Unless specifically indicated (as  
142 in Sim1\_libSize), all results in this study are from mixture data with the tpm unit.

143 To reveal the impact of the simulation models, we averaged evaluation metrics across  
144 noise levels and generated summarized evaluation heatmaps ( $11 \times 3$ ) where row index  
145 number 11 indicates the number of methods and column index number 3 indicates the  
146 number of simulation models. Based on the summarized evaluation heatmaps of correlation  
147 (Fig. 2a) and mAD (Supplementary Fig. 5a), we observed that the selection of the simulation  
148 model strongly affected evaluation results. For instance, methods like DSA<sup>11</sup>, TIMER<sup>10</sup>, and  
149 CAMfree's<sup>13</sup> rankings were all relatively higher in the negative binomial group in both  
150 correlation (Fig. 2b) and mAD (Supplementary Fig. 5b) metrics when comparing with  
151 evaluations from normal and log-normal groups. The above phenomenon indicated that the  
152 performance of some deconvolution methods is underestimated due to the underlying  
153 simulation model.



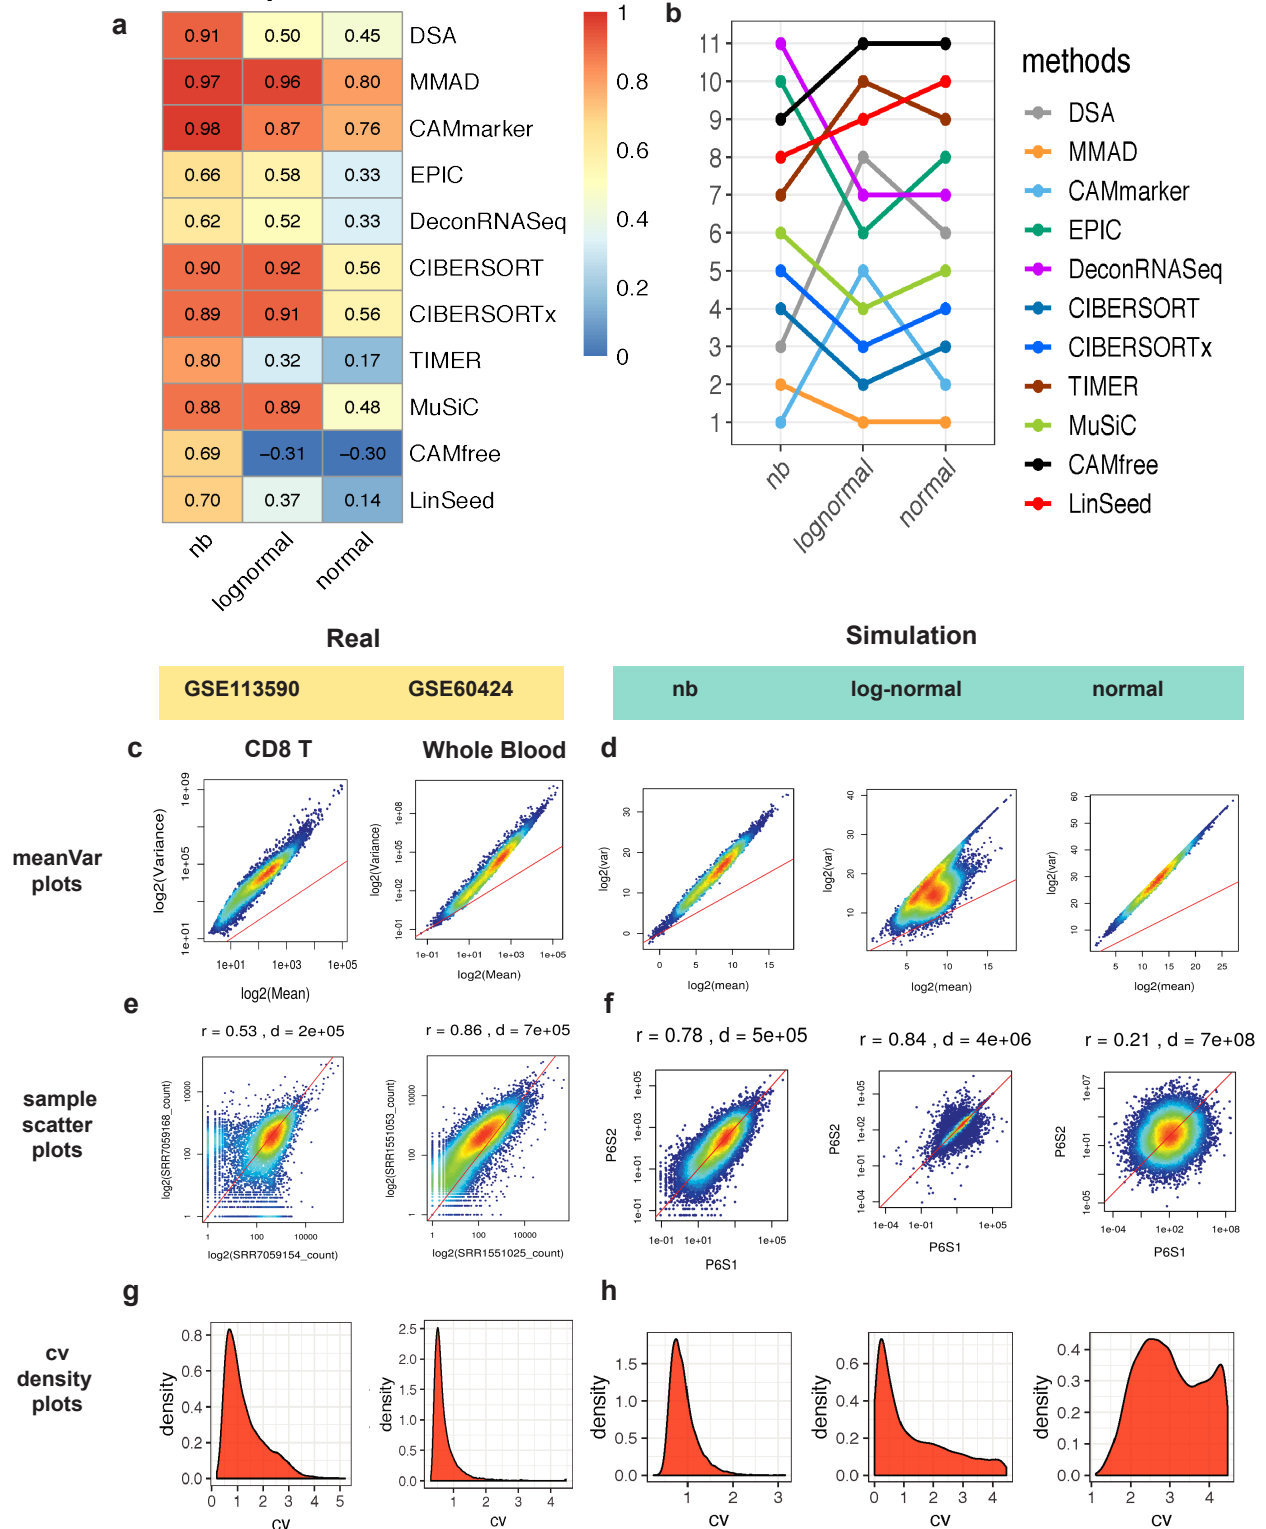

154

155 **Fig.2| Evaluation results of Sim1\_simModel and noise structure comparisons between**

156 **real and simulated data**

157 **a**, Heatmap of summarized evaluation results based on the Pearson's correlation coefficients and **b**, rankings  
158 of tested deconvolution methods in the Sim1\_simModel. In each heatmap, row indexes refer to the tested  
159 methods and column indexes refer to the simulation models (negative binomial, log-normal, and normal). **c,d**,  
160 Mean-variance plots of (**c**) real and (**d**) simulated data. (r: Spearman's correlation coefficient, d: Euclidean  
161 distance) **e,f**, sample-sample scatter plots of (**e**) real and (**f**) simulated data. **g,h**, Density plots of CV (Coefficient  
162 of variation) of (**g**) real and (**d**) simulated data. (Real data are derived from GSE113590 and GSE60424 and  
163 Supplementary Figure 6 and 7 contain detailed variance analysis results for each dataset) (All simulated data  
164 in Figure 2 are based on simulations derived from GSE51984 with the P6 noise level.) (Results in **a** and **b** are  
165 in tpm unit, results in **c-f** are in count unit)

## 166 **The negative binomial model recapitulates noise structures of real data**

167 In the Sim1\_simModel, we found that the noise structure is the main factor obscuring  
168 deconvolution performance assessment (Fig. 2a and b, Supplementary Fig. 5). To identify the  
169 simulation model that best recapitulates the essential characteristics of real data, we  
170 performed noise structure comparisons between real and simulated data by mean-variance  
171 plots, sample-sample scatter plots and coefficient of variance (CV) density plots.

172 We used the mean-variance plots to study the overall trend of variance along with the  
173 gene expression level in both real and simulated data (P6 noise level) (Fig. 2c and d). As  
174 expected, we observed that the variance and mean value of counts follow a linear trend in  
175 the log space with a clear overdispersion phenomenon, which is typical to the RNA-seq  
176 data<sup>20</sup>(Fig. 2c). However, in the simulation group, only the simulations generated from the  
177 negative binomial and normal models showed a similar mean-variance trend to the trend  
178 observed in the real data (Fig. 2d).

179 Next, we used sample-sample scatter plots to study the concordance trend of gene  
180 expression profiles(Fig. 2e and f). In real data, we observed that lowly expressed genes

181 exhibited larger relative deviances to the diagonal reference line ( $y = x$ ) than highly  
182 expressed genes (Fig. 2e). This phenomenon indicates larger uncertainties in quantifying  
183 RNA molecules with lower abundance. In the simulation group, only simulation data from  
184 the negative binomial model recapitulated higher deviances of lowly expressed genes (Fig.  
185 2f).

186 We also compared the magnitude of noise between the real and simulated data. In the  
187 real data, the sample-sample Spearman's correlation values range from 0.53 to 0.99 while  
188 the sample-sample Euclidean distances fluctuate around the order of  $10^4 \sim 10^5$   
189 (Supplementary Fig.6 a and b and Supplementary Fig. 7 a and b). In three tested simulation  
190 models, only the negative binomial model was capable of generating simulated profiles with  
191 comparable sample-sample correlation (0.57 – 0.98) and Euclidean distance (around the  
192 order of  $10^4 \sim 10^5$ ) to the real datasets (Supplementary Figure 8) while maintaining mean-  
193 variance trend with overdispersion phenomenon (Supplementary Fig. 9).

194 We compared the density curve of CV (coefficient variation) values in real and  
195 simulated data (Fig. 2g and h). Real data exhibited a unimodal bell-shaped curve, indicating  
196 that most of the genes had low to moderate levels of CV (Fig. 2g). In the simulation group,  
197 only simulations derived from the negative binomial model maintained the unimodal bell-  
198 shaped curve throughout all noise levels (Fig. 2h). CV density distributions of normal and  
199 log-normal simulation models showed density curves that were skewed towards the high CV  
200 value from noise level P6 to P10, which indicating unauthentic noise  
201 structure (Supplementary Fig. 10b).

202 In conclusion, the negative binomial simulation model, which successfully  
203 recapitulates the mean-variance trend, sample-sample concordance, the density of CV,  
204 presents the most similar noise structure to the real data. The negative binomial model also  
205 kept the magnitude of noise at comparable levels to the real data and thus should be  
206 considered as the most appropriate simulation model for generating *in silico* mixtures for  
207 deconvolution benchmarking.

### 208 **Library size normalization is required to ensure the deconvolution accuracy**

209 In this benchmarking framework, we focused on the impact of RNA-seq quantification  
210 units with mixtures that varied in their library sizes (Supplementary Fig. 1b). To reveal bias  
211 caused by varied library sizes, we designed Sim1\_libSize in which every mixture comprised  
212 of samples with varied library sizes (first 10 samples with 12M reads, and remaining 10  
213 samples with 24M reads), and our results indicate using quantification units normalized by  
214 library sizes can mitigate the bias caused by library size variation (Fig. 3a, Supplementary  
215 Fig. 11a). We summarized evaluation results across all 10 noise levels and generated  
216 evaluation heatmaps with dimensions 11 by 4 where 11 indicates the number of methods  
217 and 4 indicates the number of quantification units being tested.

218 We observed that three methods, CIBERSORT<sup>7</sup>, CIBERSORTx<sup>8</sup>, and MuSiC<sup>16</sup>, which  
219 implemented normalization procedures, showed decent performance ( $r \geq 0.9$ ,  $mAD \leq 0.1$ )  
220 regardless of the selected quantification unit (Fig. 3a, Supplementary Fig. 11a). Six methods  
221 (DSA<sup>11</sup>, MMAD<sup>12</sup>, CAMmarker<sup>13</sup>, TIMER<sup>10</sup>, CAMfree<sup>13</sup>, and LinSeed<sup>17</sup>) showed improved  
222 accuracy after library size normalization (Fig. 3a, Supplementary Fig. 11a).

223

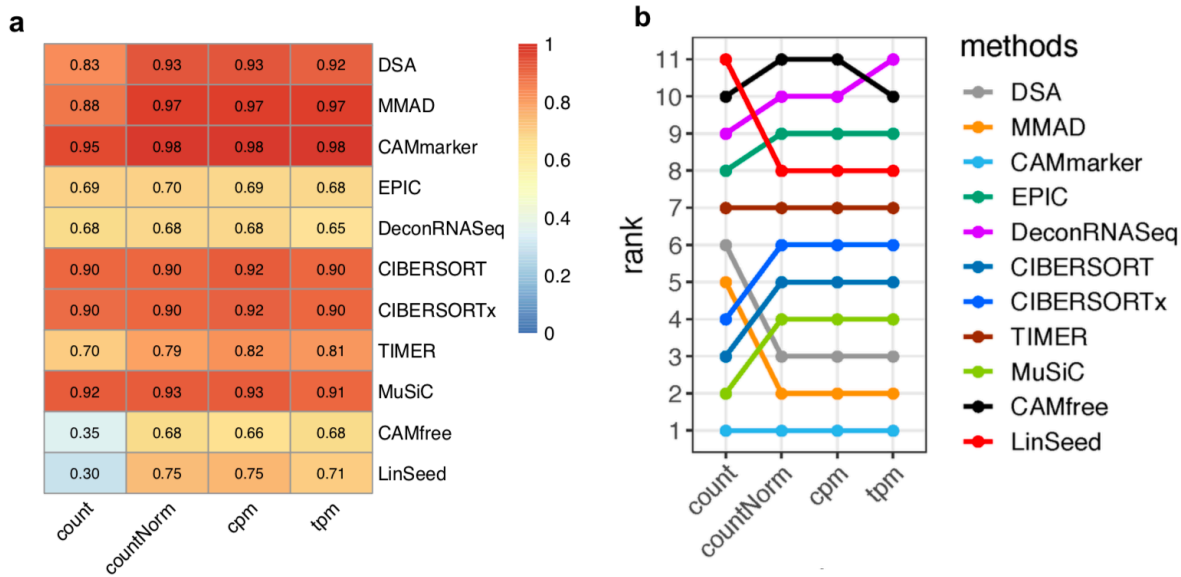

224

### 225 **Fig.3| Evaluation results of Sim1\_libSize**

226 **a**, Heatmap of summarized evaluation results based on the Pearson's correlation coefficients and **b**, rankings  
 227 of tested deconvolution methods. In each heatmap, row indexes refer to the tested methods and column indexes  
 228 refer to the quantification units (count, countNorm, cpm, and tpm).

229

230 Contradicting to the Sim1\_simModel (Supplementary Fig.3 and 4), we observed that  
 231 the choice of quantification unit had a high impact on Sim1\_libSize, which was reflected by  
 232 discrepant rankings of tested methods (Supplementary Fig. 3b and 11b). As the only  
 233 difference between the two benchmarking frameworks was the library size, we deduced that  
 234 the inconsistent performance over different quantification units was due to the library size  
 235 variation in the mixture dataset. We thus suggest researchers applying RNA-seq  
 236 quantification units that are normalized by library sizes to mitigate the bias caused by varied  
 237 library sizes unless indicated by the author of the method(MuSiC<sup>16</sup>) to use the count unit.

## 238 **Impact of cellular component number and weight matrix on deconvolution analysis**

239 To investigate the joint impact of the cellular component number and weight matrix  
240 property, we designed the benchmarking framework Sim2 with six gradients of component  
241 number ranging from 5 to 10 and two types of weight matrices: ‘orthog’ and ‘real’  
242 (Supplementary Fig. 2a and Supplementary Table 2 and 4). The ‘orthog’ weight matrix was  
243 generated by minimizing the condition number, and the ‘real’ weight matrix is constructed  
244 based on whole blood immune cell proportions in the real biological samples<sup>21</sup>(Methods).  
245 We discarded the CAMfree<sup>13</sup> method in Sim2 due to the poor scalability of CAMfree<sup>13</sup> on  
246 mixtures with large component numbers.

247 We found that nearly all deconvolution methods achieved higher accuracies with the  
248 ‘orthog’ weight matrices (Fig. 4a) than the ‘real’ weight matrices, indicating that the  
249 mathematical property of the weight matrix has a significant impact on deconvolution  
250 analysis. In the mixtures with five components (Comp 5), eight methods (DSA<sup>11</sup>, MMAD<sup>12</sup>,  
251 CAMmarker<sup>13</sup>, EPIC<sup>14</sup>, CIBERSORT<sup>7</sup>, CIBERSORTx<sup>8</sup>, MuSiC<sup>16</sup>, and LinSeed<sup>17</sup>) exhibited high  
252 accuracy levels( $r \geq 0.95$ ,  $mAD \leq 0.05$ ) in the ‘orthog’ group (Fig. 4a and Supplementary  
253 Fig. 12a) while only three of those eight methods (CIBERSORT<sup>7</sup>, CIBERSORTx<sup>8</sup>, and MuSiC<sup>16</sup>)  
254 in the ‘real’ group achieved the same level of accuracy (Fig. 4b and Supplementary Fig. 12b).

255 In addition to the impact of the weight matrix selection, cellular component numbers  
256 also affect deconvolution accuracy. In both ‘orthog’ and ‘real’ groups, the majority of methods  
257 exhibited poorer performance as cellular component number increasing (Fig. 4 a,b and  
258 Supplementary Fig. 12). It is also worth noting that none of the tested deconvolution

259 methods showed a correlation larger than 0.9 with mixtures consist of large cellular  
260 component numbers (Comp 7 to Comp 10) in the ‘real’ group (Fig. 4b).

261 To further investigate the performance of deconvolution methods with large  
262 component numbers, we explored the accuracies of mixtures with 10 cellular components  
263 and the ‘real’ weight matrix by drawing scatters plots of estimations and ground truths (data  
264 corresponds to the last column of Fig. 4b and Supplementary Fig. 12b). Surprisingly, we  
265 found that the correlation evaluation metric, which was considered as the golden standard  
266 for the evaluation of deconvolution methods, cannot reflect the deviance of estimations from  
267 ground truths (Fig. 4c). However, the deviance of estimation can be reflected by another  
268 evaluation metric mAD (Supplementary Fig. 12). For instance, MMAD<sup>12</sup> and CAMmarker<sup>13</sup>  
269 performed relatively well on the correlation evaluation metric ( $r \geq 0.65$ , Fig. 4b), but both  
270 methods had mAD values larger than 0.1, indicating large estimation deviance  
271 (Supplementary Fig. 12b). Consistent with the results from scatter plots (Fig. 4c), we found  
272 that the best performers were CIBERSORT<sup>7</sup>, CIBERSORTx<sup>8</sup>, and MuSiC<sup>16</sup>. All three methods  
273 achieved high accuracies on both correlation evaluation metric ( $r \geq 0.65$ ) (Supplementary  
274 Fig. 4b) and mAD evaluation metric ( $mAD \leq 0.02$ ) (Supplementary Fig. 12b) in the Comp  
275 10 mixture with ‘real’ weight matrix.

276 To understand the impact of each cellular component on deconvolution analysis, we  
277 drew evaluation heatmaps with cell-type-specific correlation and mAD values  
278 (Supplementary Fig. 13, 14). Based on the evaluation heatmap of mixtures with ten cellular  
279 components and the ‘real’ weight matrix, which is the most complicated *in silico* mixture set  
280 in the Sim2 benchmark framework, we identified three best performers: CIBERSORT<sup>7</sup>,

281 CIBEERSORTx<sup>8</sup>, and MuSiC<sup>16</sup> (Fig. 4 d and e). First, we found that all three methods correctly  
282 estimated major cellular components ( $r \geq 0.85$ ,  $mAD \leq 0.05$ ), such as Neutrophils, CD4T,  
283 and CD8T in the respective mixtures. Second, while all three methods failed to estimate the  
284 linear trend of proportions of rare cell subpopulations that occupies less than 1% in the  
285 mixture, such as Myeloid DC and HSC (Hematopoietic Stem Cells) ( $r: -0.19 \sim 0.35$ ), they  
286 correctly identified them as minor components and did not attribute the percentages of  
287 other cell types to these rare cell populations ( $mAD: 0 \sim 0.01$ ). Moreover, because none of  
288 the tested deconvolution methods showed good accuracies in both correlation and  $mAD$   
289 metrics with Myeloid DC and HSC (Figure 4 d and e), we concluded that none of the currently  
290 developed deconvolution methods could not reliably estimate some rare cellular  
291 populations that have proportions less than 1%. Finally, we also discovered that marker-  
292 gene based methods like DSA<sup>11</sup>, MMAD<sup>12</sup>, and CAMmarker<sup>13</sup> showed high  $mAD$  values  
293 (Figure 4d and e), indicating larger deviances in their estimations in the major  
294 components( $mAD: 0.36 \sim 0.44$ )(Fig. 4e).

295 By inspecting cell-type-specific evaluation results of ‘real’ weight matrices across 6  
296 component gradients, we found that introducing rare cellular components MyeloidDC in the  
297 Comp 7 mixture caused the deterioration of deconvolution performance, which might be due  
298 to the close relationship between MyeloidDC to the monocytes<sup>22</sup>. However, introducing  
299 relatively distinct HSC in the Comp 8 mixture further exacerbated the performance  
300 deterioration (Supplementary Figures 13 and 14, ‘real’ group). Therefore, we concluded that  
301 the deterioration of deconvolution performance on mixtures with large component number  
302 is due to the confounding effect of the highly correlated cellular component and the rare  
303 cellular component in the mixture dataset.



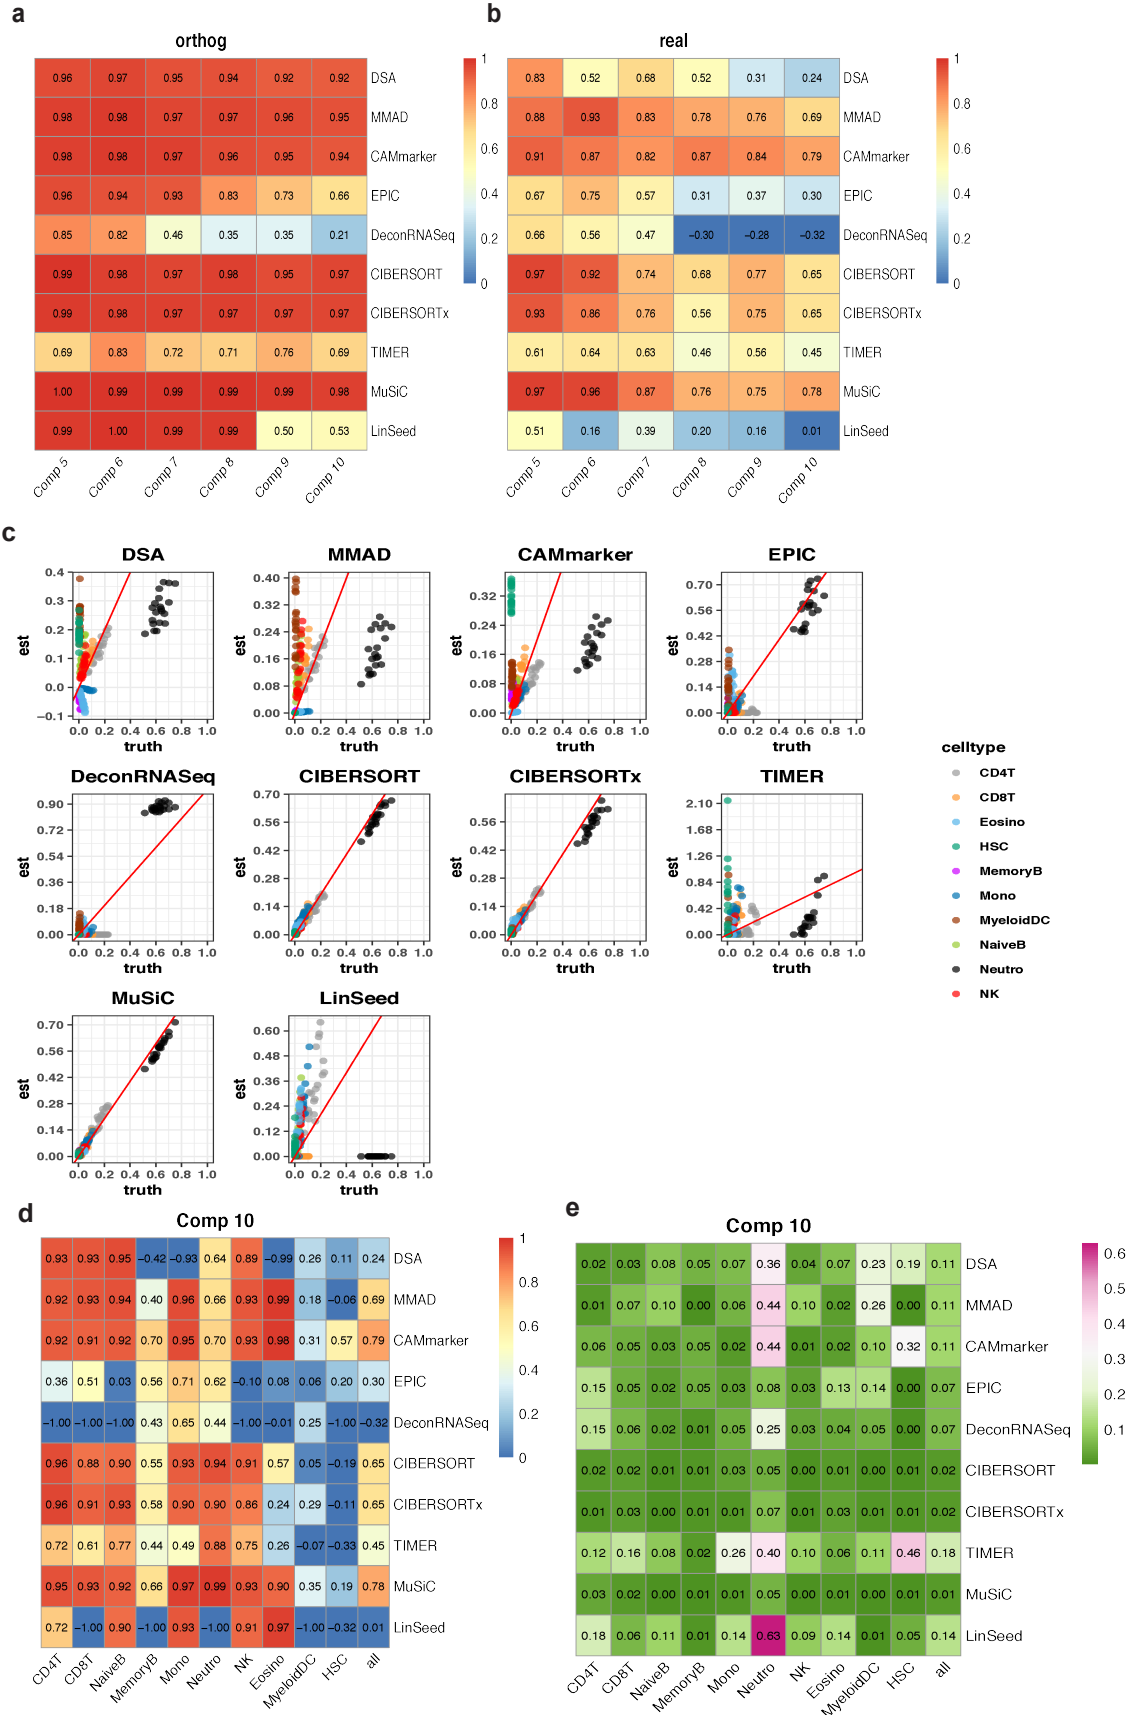

## 305 **Fig.4| Evaluation results of Sim2**

306 **a,b**, Heatmaps of summarized evaluation results based on the Pearson's correlation coefficients with (a)  
307 'orthog' weight matrix and (b) real weight matrix. In each heatmap, row indexes refer to the tested methods  
308 and column indexes refer to the cellular component numbers. **c**, Scatter plots of estimated weights vs. ground  
309 truths of mixtures with 10 cellular components. **d,e**, Cell-type specific evaluation metrics of mixtures consist of  
310 10 cellular components based on (d) Pearson's correlation coefficient and (e) Mean absolute deviance.

311

## 312 **Impact of tumor content on deconvolution analysis**

313 Unknown biological content, such as tumor content, is another major factor that  
314 influences deconvolution analysis for several reasons. First, unknown content could be  
315 treated as a source of noise unless explicitly modeled by deconvolution methods<sup>7,14</sup>. Second,  
316 unknown content is not counted in the estimated cell-type proportions and violates the sum-  
317 to-one assumption applied by the majority of deconvolution methods<sup>2,9</sup>.

318 To study the impact of unknown biological content on deconvolution analysis, we  
319 designed a benchmarking framework that contains mixtures with three sets of tumor spike-  
320 ins: the 'small' group refers to mixtures with low levels of tumor spike-ins (0 – 20%), the  
321 'large' group refers to mixtures with high levels of tumor spike-ins (70 – 90%), and the  
322 'mosaic' group refers to mixtures with more dynamic levels of tumor spike-ins (5% - 95%).  
323 Tumor spike-ins were introduced to the 12 mixture sets generated in the Sim2 framework  
324 to analyze the joint impact of the component numbers, weight matrix properties, and  
325 unknown biological contents (Supplementary Fig. 2b, Methods). In the performance  
326 assessment step, we used two sets of ground truths to derive evaluation results that

327 represent different measurement scales (Supplementary Table 5, Methods). The first set of  
328 ground truths used the absolute proportions of immune cell types and led to ‘absolute’  
329 deconvolution accuracy. The second set of ground truths used the relative proportions of  
330 immune cells and led to ‘relative’ deconvolution accuracy. In this set of analyses, we  
331 considered additional settings of deconvolution methods that were relevant to the tumor  
332 content. Thus, we evaluated eleven methods and two specific method settings  
333 TIMERTumor<sup>10</sup> and EPICabsolute<sup>14</sup>, which are tailored for deconvolution analysis with  
334 unknown tumor contents (Methods, Supplementary Table 3).

335 Our results indicated the weight matrix property as the leading factor that affected  
336 deconvolution accuracy because the ‘orthog’ group presented higher accuracies throughout  
337 all deconvolution methods and tumor content conditions (Fig. 5a, b and Supplementary Fig.  
338 15). In addition to the weight matrix property, we found that the size of tumor content also  
339 affected deconvolution accuracy as we observed deconvolution methods performed better  
340 on mixtures with smaller tumor content (Fig. 5a, b and Supplementary Fig. 15). Moreover,  
341 we found that all methods showed inconsistent performance with the ‘mosaic’ mixture group  
342 when evaluated on different measurement scales (Fig. 5a, b and Supplementary Fig. 15). For  
343 instance, in the ‘mosaic’ column, CIBERSORT<sup>7</sup> and CIBERSORTx<sup>8</sup> showed higher accuracies  
344 ( $r$ : 0.69~0.95,  $mAD$ : 0.03) in the relative measurement scale (Fig. 5a and Supplementary Fig.  
345 15a) than in the absolute measurement scale ( $r$ : 0.4~0.97,  $mAD$ : 0.06~0.07) (Fig. 5b and  
346 Supplementary Fig. 15b). Methods like DSA<sup>11</sup>, MMAD<sup>12</sup>, CAMmarker<sup>13</sup>, EPIC<sup>14</sup>,  
347 EPICabsolute<sup>14</sup>, TIMER<sup>10</sup>, TIMERTumor<sup>10</sup>, and MuSiC<sup>16</sup> showed higher accuracies in the  
348 absolute measurement scale ( $r$ : 0.33 ~ 0.9,  $mAD$ : 0.21) (Fig. 5b and Supplementary Fig. 15b)

349 than in the relative measurement scale ( $r: 0.22 \sim 0.68$ ,  $mAD: 0.17$ ) in the ‘mosaic’  
 350 column (Fig. 5a and Supplementary Fig. 15a).

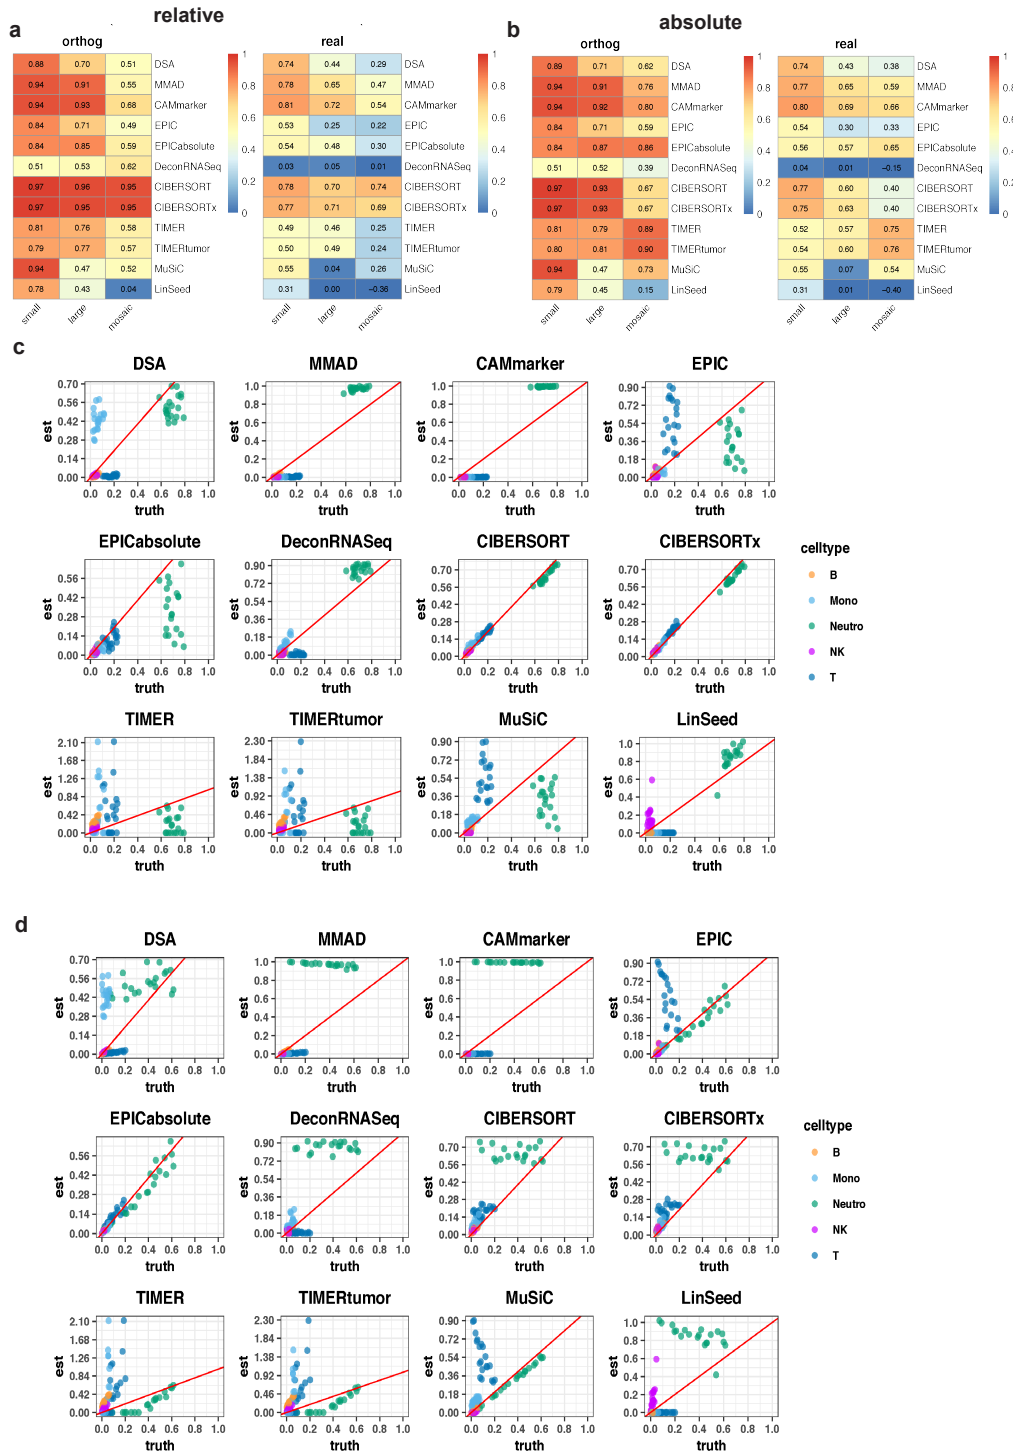

351

### 352 **Fig.5| Evaluation results of Sim3**

353 **a,b**, Heatmaps of summarized evaluation metric based on Pearson's correlation coefficients on the **(a)** relative  
354 measurement scale and **(b)** absolute measurement scale. In each heatmap, row indexes refer to the tested  
355 methods and column indexes refer to the types of tumor spike-ins (small, large, and mosaic). **c,d**, Scatter plots  
356 of estimated weights vs. ground truths of mixtures consist of 5 cellular components and mosaic tumor spike-  
357 ins. **(c)** estimated weights vs. relative ground truth **(d)** estimated weights vs. absolute ground truth.

358

359 To further investigate the performance of deconvolution methods under the cell-type  
360 resolution, we drew scatter plots of estimations from 5 Comp mixtures with 'mosaic' tumor  
361 spike-ins and 'real' weight matrix (Fig. 5 c,d). In the relative measurement scale, CIBERSORT<sup>7</sup>  
362 and CIBERSORTx<sup>8</sup> were the top performers and achieved high accuracy ( $r \geq 0.95$ ,  $mAD \leq$   
363  $0.05$ ) (Fig. 5c and Supplementary Fig. 16). However, in the absolute measurement scale,  
364 EPICabsolute<sup>14</sup> was the top performer and correctly estimated the absolute immune cell  
365 proportions ( $r \geq 0.95$ ,  $mAD \leq 0.05$ ) (Fig. 5d and Supplementary Fig. 17). Based on  
366 inconsistent evaluation results from two measurement scales, we suggest researchers pay  
367 attention to the impact of measurement scales when performing deconvolution analysis on  
368 mixtures with unknown contents.

369 Next, we checked the robustness of the three best performers in terms of component  
370 number and tumor content in the 'real' weight matrix group. The robustness of CIBERSORT<sup>7</sup>  
371 and CIBERSORTx<sup>8</sup>'s performance to the component number is high on the mAD evaluation  
372 metric (mAD: 0.02 ~ 0.05) in the relative measurement scale (Supplementary Fig. 16b).  
373 EPICabsolute<sup>14</sup> also showed high robustness to the component number on the mAD  
374 evaluation metric (mAD: 0.02 ~ 0.07) in the absolute measurement scale (Supplementary

375 Fig. 17b). We found that having a larger variance in tumor content will increase the accuracy  
376 of EPICabsolute<sup>14</sup>, as we observed that with mosaic tumor spike-ins, EPICabsolute achieved  
377 higher accuracies (r: 0.31~0.95, mAD: 0.02~0.05) than other tumor spike-in groups(r:  
378 0.17~0.84, mAD: 0.02~0.07) (Supplementary Fig. 17) in the absolute scale. Consistent with  
379 the observation in Sim2, we observed decreasing accuracies of CIBERSORT<sup>7</sup>, CIBERSORTx<sup>8</sup>,  
380 and EPICabsolute<sup>14</sup> with the increasing component number (Supplementary Fig. 16a and  
381 Supplementary Fig. 17a), and we deduced this phenomenon is due to the difficulty of current  
382 deconvolution methods estimating rare subpopulations and closely related cell-types.

383 Our results revealed the impact of unknown biological content on deconvolution  
384 analysis. We found both size (large vs. small spike-ins) and variance (large vs. mosaic spike-  
385 ins) of unknown content affected deconvolution analysis. We also observed a discrepancy in  
386 performance evaluation when used different measurement scales. In the relative scale, we  
387 concluded CIBERSORT<sup>7</sup> and CIBERSORTx<sup>8</sup> were the top performers, while in the absolute  
388 scale, EPICabsolute<sup>14</sup> was the top performer.

## 389 **Discussion**

390 In this study, we designed three *in silico* benchmarking frameworks to systematically  
391 explore the impact of several biological and technical factors. We identified top-performing  
392 deconvolution methods for each framework and clearly illustrated the strengths and limits  
393 of these tested methods under different application scenarios. Moreover, we offered several  
394 strategies to mitigate systematic biases caused by different technical and biological factors  
395 such as varied library sizes, simulation models, and cellular compositions.

396 In the first framework (Sim1), we explored the impact of noise structure under  
397 different noise levels. We identified CAMmarker, MMAD, DSA, and CIBERSORT as the best  
398 performers since these methods showed high accuracy and high robustness to diverse noise  
399 levels. For the noise structure, we identified the negative binomial as the best simulation  
400 model that captures the essential characteristics of real data. In the second framework  
401 (Sim2), we explored the impact of the cellular component number and the weight matrix  
402 property. We identified CIBERSORT, CIBERSORTx, and MuSiC as top-performers since these  
403 two methods achieved high accuracies across a gradient of cellular component numbers with  
404 both 'orthog' and 'real' weight matrices. We also found all marker-gene based methods  
405 exhibited larger estimation deviances from ground truths, this type of estimation biases is  
406 reflected in the scatter plots and can be quantitatively captured by the mAD evaluation  
407 metric, indicating the necessity of using mAD as an auxiliary evaluation metric for  
408 deconvolution performance assessment. In the third framework (Sim3), we explored the  
409 impact of unknown biological content and measurement scales. In the relative measurement  
410 scale, CIBERSORT and CIBERSORTx were the best performers. In the absolute measurement  
411 scale, EPICabsolute was the best performer. Our analysis also illustrated different evaluation  
412 results under the absolute and relative measurement scale, which have been overlooked in  
413 the previous deconvolution benchmarks.

414 Based on the observations in this benchmark, we give the following suggestions for  
415 best practices of deconvolution analysis and evaluations. For the *in silico* benchmarking data  
416 generation, we suggest researchers 1) Use the negative binomial model as the primary  
417 simulation model for *in silico* mixture data generation. 2) Referencing real biological  
418 composition data when building weight matrices. 3) Consider at least two evaluation metrics.

419 One is used for checking linear concordance between estimation and ground truth, and the  
420 other one is used for checking estimation deviances. 4) In the context of unknown biological  
421 content, beware of the influence caused by different measurement scales(absolute vs.  
422 relative). 5) Constructing multi-factor conditions on a large scale to ensure the robustness  
423 and comprehensiveness of the benchmark.

424 For deconvolution analysis, we suggest researchers 1) Use the quantification unit  
425 (countNorm, cpm, or tpm) that is normalized by library sizes. 2) Check for the compositional  
426 information from previous publications. When the targeted tissue type has a relatively stable  
427 composition over several samples, consider using deconvolution methods that are robust to  
428 non-orthog weight matrices such as CIBERSORT, CIBERSORTx, and MuSiC. When an  
429 unknown cellular component is expected (i.e., tumor sample) and the researcher needs to  
430 derive absolute proportion, consider methods like EPIC, which is specifically tailored for  
431 deconvolution with unknown content. 3) When referencing benchmark paper to select the  
432 optimal method, beware of different technical factors that might derive different estimation  
433 accuracies such as the resolution of analysis(number of cellular components), the variance  
434 of proportions across samples(weight matrix property), reference selection, evaluation  
435 metric selection, and measurement scale selection.

436 In addition to the suggestions mentioned above, previous benchmark publications  
437 also clarified the impact of signature matrices<sup>1</sup>, multicollinearity issue<sup>7</sup>, spill-over effects<sup>3,23</sup>  
438 caused by missing cellular components in the reference, minimal detection fraction<sup>3</sup>,  
439 background predictions<sup>3</sup>, marker/signature gene selection<sup>4,6</sup>, the variance between  
440 reference and mixture sources<sup>4</sup>. Some deconvolution methods like CIBERSORT, CIBERSORTx,  
441 and MuSiC can derive both cell-type-specific expression and composition signals. However,



442 by far, all independent deconvolution benchmark studies have been focused on the accuracy  
443 of compositional information<sup>3,6</sup>. More benchmarks that derive accuracies of cell-type-  
444 specific expression estimation are still in need.

445 For the future advancement of deconvolution analysis on RNA-seq data, we suggest  
446 more efforts be put into the refinement of simulation models to generate more authentic *in*  
447 *silico* testing environments that mimic diverse application scenarios. The weight matrix  
448 property was revealed as the most important factor affecting deconvolution analysis in this  
449 study and have been overlooked by the community. Therefore, more studies on the cellular  
450 compositional information and its corresponding effects on deconvolution analysis are still  
451 in need. Devotions on improving *in silico* benchmark generation strategy could further  
452 enhance the efficiency of deconvolution method development and enable a wide range of  
453 clinical applications.

## 454 **Methods**

### 455 **Data processing:**

456 Raw SRA files were downloaded from the GEO repository, processed by SRA Toolkit  
457 (2.10.0)<sup>24</sup>, and reads were aligned to the hard masked human reference GRCh38 (v95) using  
458 alignment tool STAR (2.6.1)<sup>25</sup>, and quantification was performed with RSEM (1.3.1)<sup>26</sup> with  
459 default parameter settings. Quantification matrices with the count, tpm, and fpkm units  
460 were loaded into R (3.6.1)<sup>27</sup> for feature ID transformation, duplication removal, and low-  
461 abundant gene removal. For low-abundant gene removal, we relied on two parameters:  
462 minimum sample threshold (GSE113590<sup>28</sup> - 4, other datasets - 5) and minimum expression  
463 threshold (10 counts, 1 tpm, and 1fpkm). For instance, the filtering parameter (5, 10) is used

464 to retain genes with more than 10 counts in at least 5 samples. GSE113590 only has 4  
465 samples per cellular category, and we set the minimum sample thresholds as 4. In the Sim1,  
466 we performed filtering independently on each dataset with a minimum sample threshold set  
467 at 5. For Sim2 and Sim3, we first concatenated samples into one matrix and then performed  
468 filtering with a minimum sample threshold set at 10. For the information of datasets involved  
469 in Sim1, Sim2, and Sim3, please refer to Supplementary Table 4.

#### 470 **Marker gene selection:**

471 For the marker gene selection, we selected genes that are highly expressed in the  
472 targeted cell-type and lowly expressed in other cell-types. The expression threshold is set at  
473 the 80th percentile for high expression (the targeted group) and 50th percentile for low  
474 expression (other groups). Ideally, it would be nice if all samples pass the criteria; however,  
475 to successfully derive marker genes with a larger number of cellular components, we  
476 gradually relaxed the threshold (the percentage of samples pass the criteria, initial value  $p =$   
477  $0.95$ ) by a step parameter (default value  $s = 0.03$ ) until there are at least two marker genes  
478 determined.

#### 479 **Signature gene selection:**

480 We performed differential expression testing on all cell-type pairs (all combinations  
481 of 2 elements) using DESeq2<sup>29</sup>. Then we selected genes with  $p_{adj} \leq 0.01$  and  
482  $\log_2\text{FoldChange} \geq 10$ .

#### 483 **Benchmarking framework construction:**

484 Three benchmarking frameworks are constructed to study the impact of different  
485 technical and biological factors on deconvolution analysis (Figure 1). We created simulated  
486 mixture data  $M$  ( $N$  by  $J$ ) by multiplying signature gene profiles  $S$  ( $N$  by  $K$ ) to the predefined  
487 weight matrix  $W$  ( $K$  by  $J$ ). Here,  $N$  is the number of genes,  $J$  is the number of samples, and  $K$   
488 is the number of cellular components. The noise term  $\varepsilon$  is used to model sample to sample  
489 variability where the value of  $\varepsilon$  determines the noise level.

$$490 \quad M = S \times W + \varepsilon$$

491 **Sim1:** In the Sim1, we aimed at understanding the impact of noise from different  
492 aspects such as noise structure and noise level. Sim1 consists of two sub frameworks:  
493 Sim1\_simModel and Sim1\_libSize, where Sim1\_simModel focuses on the noise structure, and  
494 Sim1\_libSize focuses on noise caused by varied library sizes.

495 **Sim1\_simModel:** In this benchmarking framework, we mainly focused on the impact  
496 of the simulation model that was used to generate noise. We selected three models for this  
497 study, which are the normal, log-normal, and negative binomial models. For each simulation  
498 model, we generated ten levels of noise where the magnitude of the noise is controlled by a  
499 corresponding variance term in each model.

500 **Normal model:**

$$501 \quad M = 2^{(\log_2(S \times W) + N(0, \sigma \times p_t))}$$

502

503 **Log-normal model:**

$$504 \quad M = S \times W + 2^{N(0, \sigma \times p_t)}$$

505

506

507 In both Log-normal and Normal simulation models, the level of noise is controlled by  
508 the product of a constant variance parameter  $\sigma$  and a perturbation level parameter  $p_t$ . In this  
509 study, we set  $\sigma$  to 10 based on previous publications<sup>7</sup> and set  $p_t$  as a length-10-vector (0, 0.1,  
510 0.2, ..., 0.9).

511 **Negative binomial model:**

512 
$$\mu_0 = r \times L_j$$

513 
$$\mu_j = \text{Gamma}(\text{shape} = \frac{1}{\sigma^2}, \text{scale} = \frac{\mu_0}{\text{shape}})$$

514 
$$\sigma = \left( 1.8 \times p_t + \frac{1}{\sqrt{\mu_0}} \right) \times \delta \text{ where } \delta \sim e^{N(0,0.25)}$$

515

516 
$$v_j = \text{Poisson}(\mu_j)$$

517 We followed the simulation process suggested by Law *et al.*<sup>19</sup> and used  $p_t$  to control  
518 the noise level for simulation.  $r$  is a vector of genomic feature proportions,  $L_j$  is the library  
519 size and,  $\mu_0$  is the expected gene expression in the simulation. In the negative binomial model,  
520 two layers of variance are added from the Gamma distribution and Poisson distribution. We  
521 derived sample gene expression vector  $\mu_j$  from Gamma sampling to model biological  
522 variance. In the Gamma distribution, the variance is determined by shape parameter  $\sigma$ . We  
523 used  $p_t$ , a length-10 vector (0.1, 0.2, ..., 0.9, 1), to regulate the value of  $\sigma$  to control the noise

524 level in the negative binomial simulation. Then we performed Poisson sampling to model  
525 technical variance and get the final simulated expression vector.

526 To ensure the universality of our conclusion on different datasets, we applied the  
527 Sim1 framework on 3 blood datasets to generate reference and *in silico* mixtures  
528 (Supplementary Fig.1). Different from previous studies that concatenate samples derived  
529 from different datasets, we generated 3 sets of simulated mixtures and 3 sets of references  
530 independently. And then used combinations of mixtures and references to generate 9  
531 replicated testing environments for each noise level. For one testing environment, there are  
532 9 (3 times 3) deconvolution results from which 6 of them have mixture-reference pairs  
533 derived from different sources. For simplicity, we only presented the averaged performance  
534 across 9 mixture-reference pairs, but the impact of mixture-reference variance is considered  
535 in this analysis. Above mentioned mixture-reference variance modeled in Sim1 is named as  
536 other noise sources in Supplementary Table 2.

537 To understand the impact of quantification units over different application scenarios,  
538 we generated simulations of the most commonly used RNA-seq quantification units: count,  
539 countNorm, cpm, and tpm.

540 
$$cpm_{i,j} = \frac{Count_{i,j}}{\sum_i Count_{i,j}} \times 10^6$$

541 
$$tpm_{i,j} = \frac{Count_{i,j}}{L_{i,j}} \times \left( \frac{1}{\sum_i \frac{Count_{i,j}}{L_{i,j}}} \right) \times 10^6$$

542 Here  $j$  is the index of the sample and  $i$  is the index of the gene.  $cpm$  is normalized by  
543 library size.  $countNorm$  is acquired from  $cpm$  units with every value rounded to the integer.  
544  $tpm$  is normalized by both library size and feature-length.

545 **Sim1\_libSize:** In this testing framework, we mainly focused on bias derived from  
546 varied library sizes. We first simulated mixtures based on the negative binomial model with  
547 the lowest level of noise in  $Sim1\_simModel$  ( $p_1$  perturbation level). The library size variation  
548 is controlled by the library size parameter  $L_j$  in the negative binomial model. For every  
549 simulation dataset that consists of 20 simulated profiles, we set the library size of the first  
550 ten samples as 12 million reads and the remaining ten samples as 24 million reads  
551 (Supplementary Fig. 1b).

552 **Sim2:** In this benchmarking framework, we studied the impact of cellular component  
553 numbers and the mathematical property of the weight matrix (Supplementary Fig.2a).  
554 Mixtures are generated based on the negative binomial model with the  $p_1$  level noise. For  
555 component number, we generated six sets of mixtures from 5 components up to 10  
556 components. For the weight matrix, we generated two sets of weight matrix: orthog and real.

#### 557 **Weight simulations:**

558 **'Orthog'** refers to the idealized weight matrix with a small condition number, which  
559 provides a relatively optimal mathematical condition for deconvolution analysis. We first  
560 simulated 1000 matrices (K by J) by randomly sampling weights from a uniform distribution  
561 and then rescaled sampled weights so that for each mixture sample, all components sum to  
562 1. Among 1000 proportion matrices, we picked the one weight matrix that has the smallest  
563 condition number. **'Real'** refers to the weight matrix that mimics immune cell compositions

564 in the real whole blood sample. We generated weights based on uniform distribution with  
565 min and max value defined based on previous observations of whole blood samples<sup>21</sup> and  
566 then rescaled weights so that all components sum to 1.

567       **Sim3:** In this benchmarking framework, we studied the impact of unknown biological  
568 content and measurement scales (Supplementary Fig.2b). To study unknown biological  
569 content, we generated mixtures with tumor content spike-ins. In total, we created three sets  
570 of tumor spike-ins: small, large, and mosaic. Tumor proportions are sampled from uniform  
571 distributions and only differ in parameters used to set minimum and maximum values in the  
572 sampling. ‘Small’ tumor spike-ins are sampled within the range 0-0.2, ‘large’ tumor spike-ins  
573 are sampled within the range 0.7-0.9, and ‘mosaic’ tumor spike-ins are sampled within the  
574 range 0.05-0.95. We then added three sets of tumor spike-in proportions to the weight  
575 matrices generated in the Sim2 and rescaled them to have proportions of all components  
576 sum to 1. After defining weights, we performed *in silico* mixing in the count unit and then  
577 normalized it to other quantification units. To study the impact of the measurement scale,  
578 we generated two sets of evaluations where one used absolute proportions of immune  
579 components as the ground truth and the other used relative proportions of immune  
580 components as the ground truth. The toy example of the absolute measurement scale and  
581 the relative measurement scale is in Supplementary Table 5.

### 582 **Assessment of deconvolution performance**

583  $J$  is the total number of mixture samples in a dataset and  $j$  is the sample index.  $x_j$  is the  
584 estimated proportion of sample  $j$  and  $y_j$  is the ground truth of sample  $j$ . When a

585 deconvolution returns NA values, we directly assign highest penalty for the evaluation  
586 metrics:  $r = -1$ , and  $mAD = 1$ .

587 **Pearson Correlation Coefficient (r):**

588 
$$\frac{\sum_{j=1}^J (x_j - \bar{x})(y_j - \bar{y})}{\sqrt{\sum_{j=1}^J (x_j - \bar{x})^2 \sum_{j=1}^J (y_j - \bar{y})^2}}$$

589 **Mean Absolute Deviance (mAD):**

590 
$$\frac{\sum_{j=1}^J |x_j - y_j|}{J}$$

591

592 **Datasets description:**

- 593 **1. GSE60424**<sup>30</sup> - Consists of 134 RNA-seq profiles of 6 immune cell types and whole  
594 blood from both healthy donors and donors with five immune-associated diseases.
- 595 **2. GSE113590**<sup>28</sup> - Consists of 32 CD8 T cell RNA-seq profiles from peripheral blood,  
596 colorectal tumor samples, and lung tumor samples.
- 597 **3. GSE64655**<sup>31</sup> - Consists of 56 RNA-seq profiles of 6 immune cell types and peripheral  
598 blood from two vaccinated donors.
- 599 **4. GSE51984**<sup>32</sup> - Consists of 24 RNA-seq profiles of 5 immune cell types and total white  
600 blood cells from healthy donors
- 601 **5. GSE115736**<sup>33</sup> - Consists of 42 RNA-seq profiles of 12 immune cell types from healthy  
602 donors.
- 603 **6. GSE118490**<sup>34</sup> - HCT116 profiles (unknown tumor content in Sim3)



## 604 **Data and code availability**

605 All data and codes are available in the  
606 [https://github.com/LiuzLab/paper\\_deconvBenchmark](https://github.com/LiuzLab/paper_deconvBenchmark) under MIT license.

## 607 **Author contributions**

608 H.J. designed, planned, and conducted data analysis and wrote the manuscript.

609 Z.L. supervised the analysis and wrote the manuscript. All authors read and approved the  
610 final manuscript.

## 611 **Competing interests**

612 The authors declare no competing interests.

## 613 **References**

- 614 1. Vallania, F. *et al.* Leveraging heterogeneity across multiple datasets increases cell-  
615 mixture deconvolution accuracy and reduces biological and technical biases. *Nat.*  
616 *Commun.* **9**, (2018).
- 617 2. Avila Cobos, F., Vandesompele, J., Mestdagh, P. & De Preter, K. Computational  
618 deconvolution of transcriptomics data from mixed cell populations. *Bioinformatics* 1–  
619 11 (2018). doi:10.1093/bioinformatics/bty019
- 620 3. Sturm, G. *et al.* Comprehensive evaluation of transcriptome-based cell-type  
621 quantification methods for immuno-oncology. *Bioinformatics* **35**, i436–i445 (2019).
- 622 4. Schelker, M. *et al.* Estimation of immune cell content in tumour tissue using single-cell  
623 RNA-seq data. *Nat. Commun.* **8**, 2032 (2017).

- 624 5. Weber, L. M. *et al.* Essential guidelines for computational method benchmarking. *arXiv*  
625 1–12 (2018).
- 626 6. Cobos, F. A., Alquicira-Hernandez, J., Powell, J., Mestdagh, P. & De Preter, K.  
627 Comprehensive benchmarking of computational deconvolution of transcriptomics  
628 data. (2020). doi:10.1101/2020.01.10.897116
- 629 7. Newman, A. M. *et al.* Robust enumeration of cell subsets from tissue expression  
630 profiles. *Nat. Methods* **12**, 1–10 (2015).
- 631 8. Newman, A. M. *et al.* Determining cell type abundance and expression from bulk  
632 tissues with digital cytometry. *Nat. Biotechnol.* **37**, 773–782 (2019).
- 633 9. Mohammadi, S., Zuckerman, N., Goldsmith, A. & Grama, A. A Critical Survey of  
634 Deconvolution Methods for Separating Cell Types in Complex Tissues. *Proc. IEEE* **105**,  
635 340–366 (2017).
- 636 10. Li, B. *et al.* Comprehensive analyses of tumor immunity: Implications for cancer  
637 immunotherapy. *Genome Biol.* **17**, 1–16 (2016).
- 638 11. Zhong, Y., Wan, Y.-W., Pang, K., Chow, L. M. L. & Liu, Z. Digital sorting of complex tissues  
639 for cell type-specific gene expression profiles. *BMC Bioinformatics* **14**, 89 (2013).
- 640 12. Liebner, D. A., Huang, K. & Parvin, J. D. MMAD: Microarray microdissection with  
641 analysis of differences is a computational tool for deconvoluting cell type-specific  
642 contributions from tissue samples. *Bioinformatics* **30**, 682–689 (2014).
- 643 13. Chen, L. CAMTHC: Convex Analysis of Mixtures for Tissue Heterogeneity  
644 Characterization. (2019).

- 645 14. Racle, J., de Jonge, K., Baumgaertner, P., Speiser, D. E. & Gfeller, D. Simultaneous  
646 enumeration of cancer and immune cell types from bulk tumor gene expression data.  
647 *Elife* **6**, 1–25 (2017).
- 648 15. Gong, T. & Szustakowski, J. D. DeconRNASeq: A statistical framework for  
649 deconvolution of heterogeneous tissue samples based on mRNA-Seq data.  
650 *Bioinformatics* **29**, 1083–1085 (2013).
- 651 16. Wang, X., Park, J., Susztak, K. & Zhang, N. R. Bulk tissue cell type deconvolution with  
652 multi-subject single-cell expression reference. *Nat. Commun.* doi:10.1038/s41467-  
653 018-08023-x
- 654 17. Zaitsev, K., Bambouskova, M., Swain, A. & Artyomov, M. N. based on linearity of  
655 transcriptional signatures. *Nat. Commun.* 1–16 doi:10.1038/s41467-019-09990-5
- 656 18. Zappia, L., Phipson, B. & Oshlack, A. Splatter: Simulation of single-cell RNA sequencing  
657 data. *Genome Biol.* **18**, 1–15 (2017).
- 658 19. Law, C. W., Chen, Y., Shi, W. & Smyth, G. K. voom: Precision weights unlock linear model  
659 analysis tools for RNA-seq read counts. *Genome Biol.* **15**, R29 (2014).
- 660 20. Robinson, M. D., McCarthy, D. J. & Smyth, G. K. edgeR: A Bioconductor package for  
661 differential expression analysis of digital gene expression data. *Bioinformatics* **26**,  
662 139–140 (2009).
- 663 21. Inc., S. T. Frequencies of Cell Types in Human Peripheral Blood. (2017).
- 664 22. Calderon, D. *et al.* Landscape of stimulation-responsive chromatin across diverse  
665 human immune cells. *Nat. Genet.* **51**, 1494–1505 (2019).

- 666 23. Aran, D., Hu, Z. & Butte, A. J. xCell: Digitally portraying the tissue cellular heterogeneity  
667 landscape. *Genome Biol.* **18**, 1–14 (2017).
- 668 24. Leinonen, R., Sugawara, H. & Shumway, M. The sequence read archive. *Nucleic Acids*  
669 *Res.* **39**, 2010–2012 (2011).
- 670 25. Dobin, A. *et al.* STAR: Ultrafast universal RNA-seq aligner. *Bioinformatics* **29**, 15–21  
671 (2013).
- 672 26. Li, B. & Dewey, C. N. RSEM: accurate transcript quantification from RNA-Seq data with  
673 or without a reference genome. *BMC Bioinformatics* **12**, 323 (2011).
- 674 27. R Core Team. R: A Language and Environment for Statistical Computing. (2019).
- 675 28. Simoni, Y. *et al.* Bystander CD8+ T cells are abundant and phenotypically distinct in  
676 human tumour infiltrates. *Nature* **557**, 575–579 (2018).
- 677 29. Love, M. I., Huber, W. & Anders, S. Moderated estimation of fold change and dispersion  
678 for RNA-seq data with DESeq2. *Genome Biol.* **15**, 1–21 (2014).
- 679 30. Linsley, P. S., Speake, C., Whalen, E. & Chaussabel, D. Copy number loss of the interferon  
680 gene cluster in melanomas is linked to reduced T cell infiltrate and poor patient  
681 prognosis. *PLoS One* **9**, (2014).
- 682 31. Hoek, K. L. *et al.* A cell-based systems biology assessment of human blood to monitor  
683 immune responses after influenza vaccination. *PLoS One* **10**, 1–24 (2015).
- 684 32. Pabst, C. *et al.* GPR56 identifies primary human acute myeloid leukemia cells with high  
685 repopulating potential in vivo. *Blood* **127**, 2018–2027 (2016).

686 33. Choi, J. *et al.* Haemopedia RNA-seq: A database of gene expression during  
687 haematopoiesis in mice and humans. *Nucleic Acids Res.* **47**, D780–D785 (2019).

688 34. Wagner, S. *et al.* Suppression of interferon gene expression overcomes resistance to  
689 MEK inhibition in KRAS-mutant colorectal cancer. *Oncogene* **38**, 1717–1733 (2019).

690

691
